# Supplementary material
Source: Research Square preprint supplement (doi:10.21203/rs.3.rs-8645116/v1)
Supplement: Supplementary file 1 [file 6c107e45ba3ea49c8b3e4a37.pdf]

## **Supplementary Material**

# **Ray-LLM: Suppressing Runge's Phenomenon in Data-Sparse Fisheye Calibration via Neuro-Symbolic Synthetic Anchoring**

January 20, 2026

**Note.** This supplementary document provides additional details and visualizations that are omitted from the main manuscript due to space constraints. The contents focus on zone-based diagnostics, geometric candidate metrics, and active pool update behaviors (ADD/SWAP), including memory module terminology and experimental validation on on-site data.

## S1. 9-Zone Partition and Zone-wise Error Heatmaps

This section provides implementation details and qualitative visualizations of the 9-zone diagnostic used in Ray-LLM.

### S1.1 Zone Partition

Let an image have width  $W$  and height  $H$ . For each frame  $n$ , we compute the checkerboard corner centroid  $\mathbf{c}_n = (c_{n,x}, c_{n,y})$  and assign a zone index  $z_n \in \{0, \dots, 8\}$  by:

$$i_n = \min\left(2, \max\left(0, \left\lfloor \frac{3c_{n,x}}{W} \right\rfloor\right)\right), \quad j_n = \min\left(2, \max\left(0, \left\lfloor \frac{3c_{n,y}}{H} \right\rfloor\right)\right), \quad z_n = 3j_n + i_n. \quad (\text{S1.1})$$

### S1.2 Zone-wise RMS Heatmap

Given corner correspondences  $\{(\mathbf{X}_{n,k}, \mathbf{u}_{n,k})\}$ , the fisheye projection model  $\pi(\cdot; \Theta)$  produces predicted pixels  $\hat{\mathbf{u}}_{n,k} = \pi(\mathbf{X}_{n,k}; \Theta)$ . The reprojection residual is:

$$\mathbf{e}_{n,k} = \mathbf{u}_{n,k} - \hat{\mathbf{u}}_{n,k}. \quad (\text{S1.2})$$

For each zone  $z$ , we collect corner indices:

$$\mathcal{I}_z = \{(n, k) \mid z_n = z\}. \quad (\text{S1.3})$$

The zone-wise RMS is computed as:

$$\epsilon_z = \sqrt{\frac{1}{|\mathcal{I}_z|} \sum_{(n,k) \in \mathcal{I}_z} \|\mathbf{e}_{n,k}\|_2^2}, \quad z \in \{0, \dots, 8\}. \quad (\text{S1.4})$$

The heatmap vector is defined as:

$$\mathbf{H} = [\epsilon_0, \dots, \epsilon_8]^\top \in \mathbb{R}^9. \quad (\text{S1.5})$$

### S1.3 Visualization: Early vs. Converged Heatmaps

Fig. 1 compares zone-wise RMS heatmaps at the beginning of optimization and after convergence, highlighting the reduction of peripheral errors.

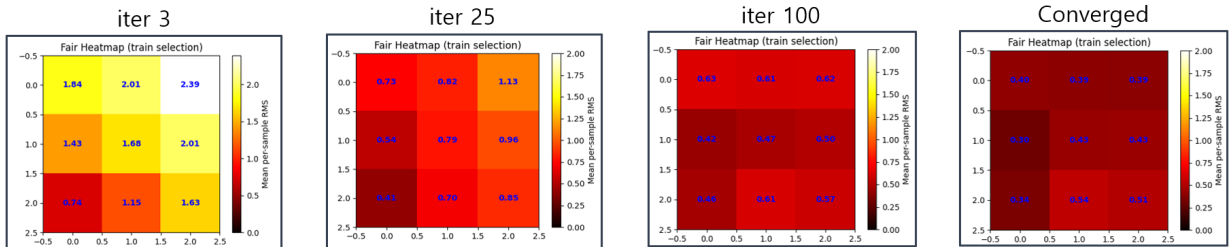

Figure 1: Comparison of zone-wise RMS heatmaps: (left) at the beginning of optimization to (right) after convergence.

## S2. Geometric Candidate Metrics (dist / tilt)

This section provides implementation details and visual examples of the candidate metrics used in Ray-LLM.

### S2.0 Candidate Construction

For each frame, we detect checkerboard corners using the same detector as the main calibration pipeline. A frame is considered a valid candidate if it satisfies a minimum corner count requirement ( $N \geq N_{\min}$ ). Let  $\{\mathbf{u}_k\}_{k=1}^N$  be the detected 2D corners in image coordinates, where  $\mathbf{u}_k = (x_k, y_k) \in \mathbb{R}^2$ .

**Corner centroid.**

$$\mathbf{c} = \frac{1}{N} \sum_{k=1}^N \mathbf{u}_k. \quad (\text{S2.1})$$

**Minimum-area rectangle (minAreaRect):** We compute the minimum-area bounding rectangle enclosing all detected corners and denote its side lengths by  $(w_{\min}, h_{\min})$ . We use the aspect ratio as a stable proxy for viewpoint obliqueness.

**Candidate pool:** All valid frames are stored in a candidate pool  $\mathcal{P}$ , each associated with  $\mathbf{c}$ ,  $(w_{\min}, h_{\min})$ , and the derived metrics below.

### S2.1 dist: Normalized Peripheral Coverage

We define dist as the normalized distance between the centroid  $\mathbf{c} = (c_x, c_y)$  and the image center  $\mathbf{o} = (W/2, H/2)$ :

$$\text{dist}(\mathbf{c}) = \frac{\|\mathbf{c} - \mathbf{o}\|_2}{\sqrt{(W/2)^2 + (H/2)^2}}. \quad (\text{S2.2})$$

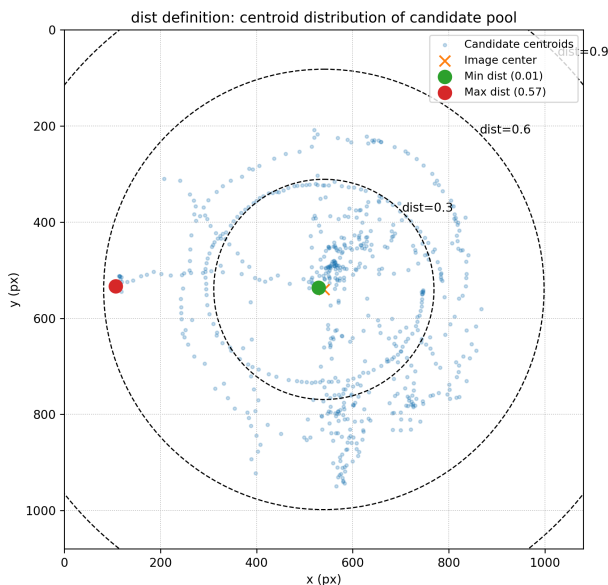

Figure 2: Definition of dist and example distribution of candidates from center to periphery.

## S2.2 tilt: Viewpoint Obliqueness Proxy

We define tilt from the aspect ratio of the minimum-area rectangle:

$$\text{tilt} = \frac{\max(w_{\min}, h_{\min})}{\min(w_{\min}, h_{\min}) + \epsilon}, \quad (\text{S2.3})$$

where  $\epsilon$  is a small constant (e.g.,  $10^{-6}$ ) to avoid division by zero.

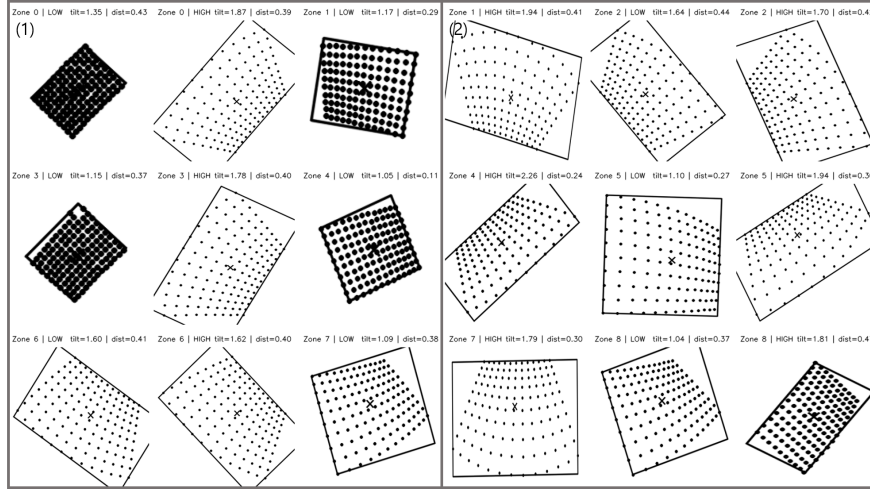

Figure 3: Definition of tilt with qualitative examples of low-tilt (1) vs. high-tilt (2) frames.

## S2.3 Candidate Ranking in Implementation

In implementation, candidates can be prioritized by a weighted score:

$$s = \alpha \cdot \text{dist} + (1 - \alpha) \cdot \text{tilt}, \quad (\text{S2.4})$$

where  $\alpha \in [0, 1]$  is selected depending on the objective.

### S3. ADD vs. SWAP Examples (Before → After)

**Purpose.** Ray-LLM updates the calibration pool at each iteration using two discrete actions:

- **ADD:** injects physically anchored synthetic observations into under-covered zones.
- **SWAP:** replaces high-residual samples with geometrically superior candidates to stabilize unstable zones.

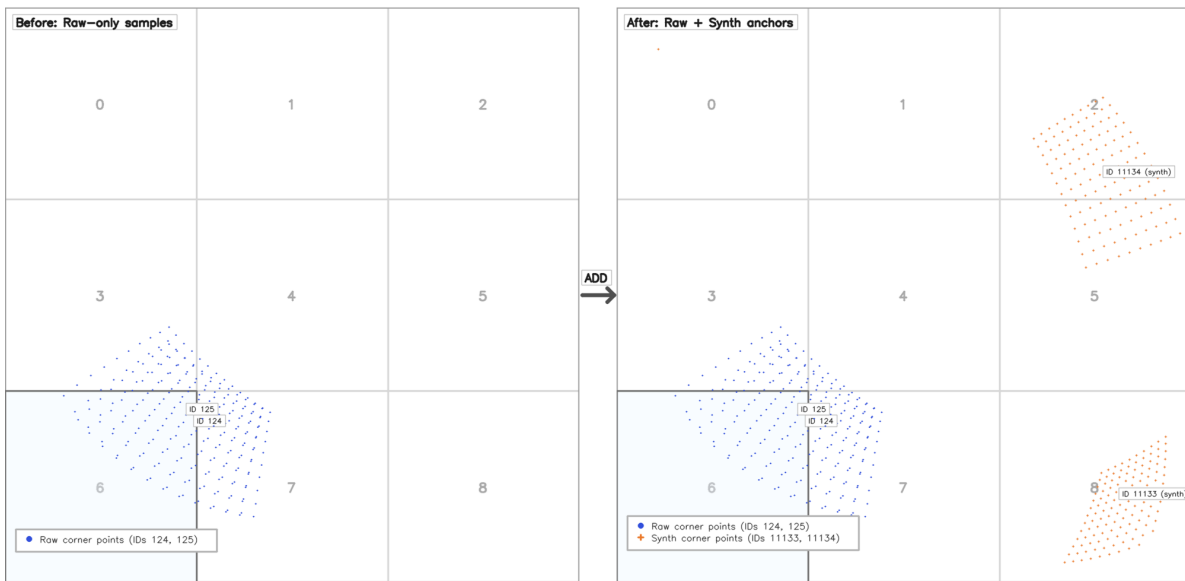

Figure 4: **ADD** example (Before → After): synthetic anchors injected into a sparse peripheral zone.

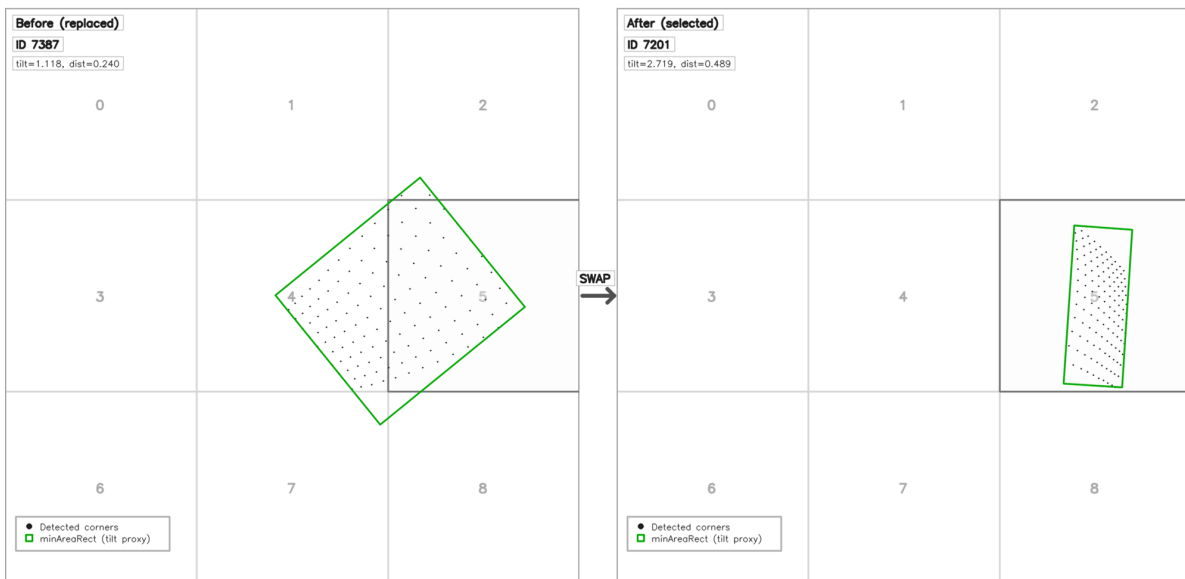

Figure 5: **SWAP** example (Before → After): high-residual samples replaced to stabilize a problematic zone.

## S4. Terminology Definitions: Calibration Brain / Experience Buffer

**Purpose.** To reduce regression and repetitive ineffective actions during long iterative optimization, Ray-LLM maintains two lightweight memory modules: **Calibration Brain** and **Experience Buffer**. This section defines each module and provides real examples from our implementation logs.

### S5.1 Calibration Brain (JSON)

**Definition.** The **Calibration Brain** is a persistent JSON memory that accumulates **zone-wise strategy statistics** (e.g., effectiveness of ADD/SWAP under different criteria). It is indexed by zone (0 ~ 8) and criteria (e.g., `worst_err`, `moreedge`).

| Field                                 | Type              | Meaning                                                                                                                                                                                                                                           |
|---------------------------------------|-------------------|---------------------------------------------------------------------------------------------------------------------------------------------------------------------------------------------------------------------------------------------------|
| <code>zone_scores[z][criteria]</code> | dict              | Per-zone strategy tracker for a selection criterion (one entry per zone in this run).                                                                                                                                                             |
| <code>score</code>                    | float             | Accumulated effectiveness score (implementation-defined; may be negative if improvements were not sustained).                                                                                                                                     |
| <code>wins/tries</code>               | int / int         | Number of successful updates vs. total attempts recorded for this zone and criterion.                                                                                                                                                             |
| <code>context_score</code>            | dict[str → float] | Context-dependent effectiveness (keyed by tags such as <code>OVERFIT</code>   <code>SWAP</code> , <code>WEAK_DIST</code>   <code>ADD</code> ).                                                                                                    |
| <code>history</code>                  | list[dict]        | Compact history of past trials. Each record contains: <code>n</code> (trial index), <code>dt</code> (test RMS change), <code>dz</code> (zone RMS change), <code>mode</code> (ADD/SWAP), <code>tags</code> , <code>imp</code> (improvement score). |

Table 1: Calibration Brain schema (JSON).

#### Real JSON snippet (from `calibration_brain.json`).

```
"zone_scores": {
  "5": {
    "brain_best": {
      "score": 15.688160987177,
      "wins": 136,
      "tries": 406,
      "context_score": {
        "MODE_SWAP": 39.6923530945177
      },
      "history": [
        {
          "n": 3, "dt": -0.00249,
          "dz": -0.00347,
          "mode": "SWAP",
          "tags": [
            "MODE_SWAP"
          ],
          "imp": -0.17
        },
        {
          "n": 3,
          "dt": 0.00306,
          "dz": 0.00788,
          "mode": "ADD",
          "tags": [
```

```

        "MODE_ADD"
    ],
    "imp": 0.32
  },
  {
    "n": 5,
    "dt": -0.01105,
    "dz": -0.02264,
    "mode": "SWAP",
    "tags": [
      "MODE_SWAP"
    ],
    "imp": 0.98
  }
}

```

This JSON structure allows Ray-LLM to reuse zone-specific action priors (e.g., which zones tend to benefit from ADD vs. SWAP under certain instability contexts).

## S5.2 Experience Buffer (JSONL)

**Definition.** The **Experience Buffer** is a JSONL log file where each line stores one step of a **state-action-outcome** trajectory. It is used to retrieve previously effective decisions under similar geometric conditions.

Table 2: Schema definition of `experience_buffer.jsonl` (one JSON record per iteration).

| Field                        | Type     | Description                                                                                           |
|------------------------------|----------|-------------------------------------------------------------------------------------------------------|
| <code>ts</code>              | float    | Unix timestamp of the record.                                                                         |
| <code>round, iter</code>     | int      | Round and iteration index.                                                                            |
| <code>state</code>           | dict     | Telemetry snapshot (RMS errors, intrinsics, distortion coefficients, worst zones).                    |
| <code>action</code>          | dict     | Selected action: target zone, mode (ADD/SWAP), and criteria.                                          |
| <code>accepted</code>        | bool     | Whether the action was applied after masking/validation.                                              |
| <code>outcome</code>         | dict     | Performance deltas after the action (e.g., $\Delta_{\text{test RMS}}$ , $\Delta_{\text{edge RMS}}$ ). |
| <code>rollback_reason</code> | str/null | Rejection reason if <code>accepted=false</code> .                                                     |

### Real JSONL examples (from `experience_buffer.jsonl`).

```

{"ts": 1767.6877432, "round": 1, "iter": 471, "state":
{"ret": 0.7613044020340065, "test_rms": 0.7940791394157624, "edge_rms": 1.1389232834463858,
"fx": 257.24377069797214, "fy": 255.95847005674273,
"k_vals": [0.055724680228209734, 0.13008083344438282, -0.08673881703572073,
0.01686081964376545], "k_tag": "NOMINAL", "bad_zones": [2, 6, 8], "fov_diag":
164.68442008901894},
"action": {"zone": 2, "mode": "SWAP", "criteria": "moreedge", "synth_params":
{"source_model": "AUTO",
"force_corner": true, "tilt_range": [15, 45], "noise_sigma": 0.15, "recipe_tag":
"ZONE_DEFAULT", "zone": 2, "criteria": "moreedge"}}, "accepted": true, "outcome":
{"delta_test_loss": 0.0, "delta_test_rms": 0.0, "delta_edge_rms": 0.0}, "rollback_reason":
null
}

```

By keeping a trajectory-level record, Ray-LLM can avoid repeatedly trying ineffective actions, and instead prioritize previously successful interventions under matching states.

## S5. Experimental Validation on High-Resolution On-site Data

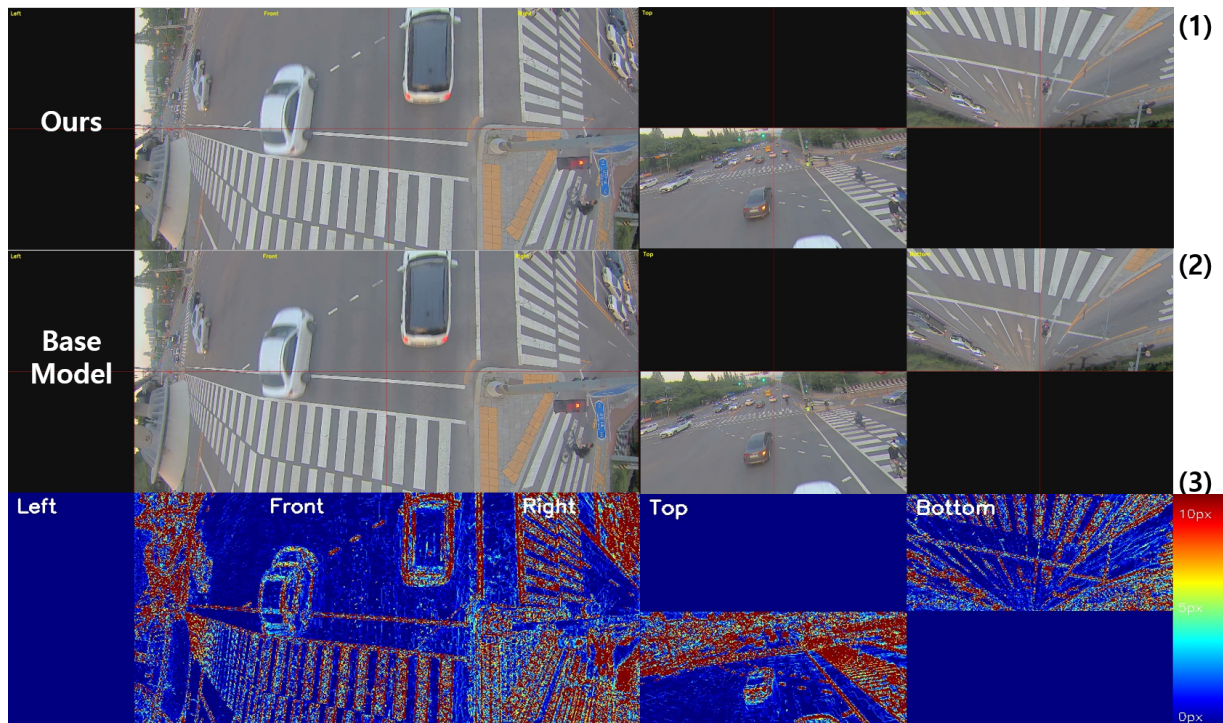

Figure 6: Comparative analysis of on-site extrinsic calibration. (1) Ours: Implementation of LLM-synthesized peripheral data to mitigate sparsity. (2) Base Model: OpenCV-based calibration exhibiting significant overfitting to central data clusters. (3) Error Heatmap: Spatial distribution of pixel-wise registration errors (0–10 px). Notably, while the model was trained at 1080p resolution, this on-site application demonstrates performance at 3008p resolution.
